# Supplementary material for: Editing of StSR4 by Cas9-RNPs confers resistance to Phytophthora infestans in potato
Source: PubMed Central journal article supplement (PMC9539116; doi:10.3389/fpls.2022.997888), 2022-09-23
Supplement: DataSheet_1.pdf [file DataSheet_1.pdf]

**Table S1. Primers used in this study.**

| Gene            | Primer name     | Sequence (5' - 3')                                                 | Product size |
|-----------------|-----------------|--------------------------------------------------------------------|--------------|
| <i>StSR4</i>    | StSR4_F1(446)   | AGT TCT CGA GGT CGC AGG AG                                         | 278          |
|                 | SR4_R-T7        | GAG GGA CAC CAA TGA CTA CAT G                                      |              |
| <i>StSR4</i>    | SR4_F (adapter) | TCG TCG GCA GCG TCA GAT GTG TAT AAG AGA CAG AGT TCT CGA GGT CGC AG | 356          |
|                 | SR4_R (adapter) | GTC TCG TGG GCT CGG AGA TGT GTA TAA GAG ACA GGA GGG ACA CCA ATG AC |              |
| <i>StEDS1</i>   | StEDS1_F(q)     | GAC ACA GTT TCG CAG GCA AG                                         | 265          |
|                 | StEDS1_R(q)     | CCA GCC ATT TGC AGC TGT TT                                         |              |
| <i>StPAD4</i>   | StPAD4_F        | GAC TCA GCT TTT CCG CGT TG                                         |              |
|                 | StPAD4_R        | TGC TTC ATA GCT CGA CTC CG                                         |              |
| <i>StPR1</i>    | StPR1_F(q)      | CAG CTG TGC AAT TGT GGG TG                                         | 201          |
|                 | StPR1_R(q)      | GTT GTC CGA CCC AGT TTC CA                                         |              |
| <i>StEF1a</i>   | EF1a_F(q)       | CTT GAC GCT CTT GAC CAG ATT                                        | 61           |
|                 | EF1a_R(q)       | GAA GAC GGA GGG GTT TGT CT                                         |              |
| <i>StCAMTA2</i> | StCAMTA2_F      | AGG AAG TTC ATC ACC GCT GG                                         | 226          |
|                 | StCAMTA2_R      | CTG CCT GCC GTG AAC TTT TC                                         |              |
| <i>StCAMTA4</i> | StCAMTA4_F      | TGG ATC CAA CCC TGA CGA AT                                         | 202          |
|                 | StCAMTA4_R      | CCA CGT GCA CTC TGA AGG AT                                         |              |
| <i>StCAMTA5</i> | StCAMTA5_F      | TGG TGA TTT GCA GGA TGG CT                                         | 200          |
|                 | StCAMTA5_R      | AAT CAC CTG CAC CCA CTG TC                                         |              |
| <i>StCAMTA6</i> | StCAMTA6_F      | GTC CTG TCT TCT ACT GAT TGA CA                                     | 231          |
|                 | StCAMTA6_R      | AGG AGA CAC CAT TGA GGC TG                                         |              |

**Table S2 . Summary of screening in *sts4* mutants**

|         | Target sequence<br>(5'-3') | No. of<br>regenerated plants | No. of<br>mutants | No. of mutants for<br>screening by NGS | No. of full<br>allele mutation | No. of full<br>allele KO |
|---------|----------------------------|------------------------------|-------------------|----------------------------------------|--------------------------------|--------------------------|
| StSR4_1 | GCTACAGAGAAAGTTCTACT       | 691                          | 170 (24.6%)       | 76                                     | 4 (4%)                         | 3                        |
| StSR4_3 | ACAGATTGACAATTACTTCT       | 708                          | 240 (33.9%)       | 78                                     | 9 (12%)                        | 3                        |

**Table S3. Specific primer sets for 8 candidate off-target sites**

| Off-target | Primers | Sequence (5'->3')         | Length (bp) | Product length (bp) |
|------------|---------|---------------------------|-------------|---------------------|
| OT1        | Forward | CAAAAACCTTGCCTACAAATGCAC  | 24          | 290                 |
|            | Reverse | CGTCGTTTGGGATCGGAGAAT     | 21          |                     |
| OT2        | Forward | CCATCTGTTAGATTATGTGGCATT  | 24          | 282                 |
|            | Reverse | ACCACCACTATTTATAGGTGAGGAA | 25          |                     |
| OT3        | Forward | CATGACAAATTCATTATTTATCCAA | 25          | 297                 |
|            | Reverse | GTGAAGATCGAGTTAGCAAAAA    | 22          |                     |
| OT4        | Forward | TTGGACAAAGCTTGTTCTTT      | 21          | 280                 |
|            | Reverse | TATATGTTAGTTTTCTTCCTTCTCA | 25          |                     |
| OT5        | Forward | ACAACCTCTTGCAAAAATGC      | 20          | 280                 |
|            | Reverse | TGAATCTACTTTGATTTCTCCTTGT | 25          |                     |
| OT6        | Forward | TCATTATTTATCCAATGACAAGTAT | 25          | 285                 |
|            | Reverse | GAAGATCGAGTTAGCAAAAATGA   | 23          |                     |
| OT7        | Forward | AAAATAATCAATGTGTTGTGAACTC | 25          | 250                 |
|            | Reverse | TTCAGAATCATACTTAACTGCCT   | 23          |                     |
| OT8        | Forward | TTGACTTGGTTGAAAGGGGA      | 20          | 280                 |
|            | Reverse | GTAAAATTATCTTGTGCACTAACTG | 25          |                     |
