# Supplementary material for: Editing of StSR4 by Cas9-RNPs confers resistance to Phytophthora infestans in potato
Source: PubMed Central journal article supplement (PMC9539116; doi:10.3389/fpls.2022.997888), 2022-09-23
Supplement: DataSheet_2.pdf [file DataSheet_2.pdf]

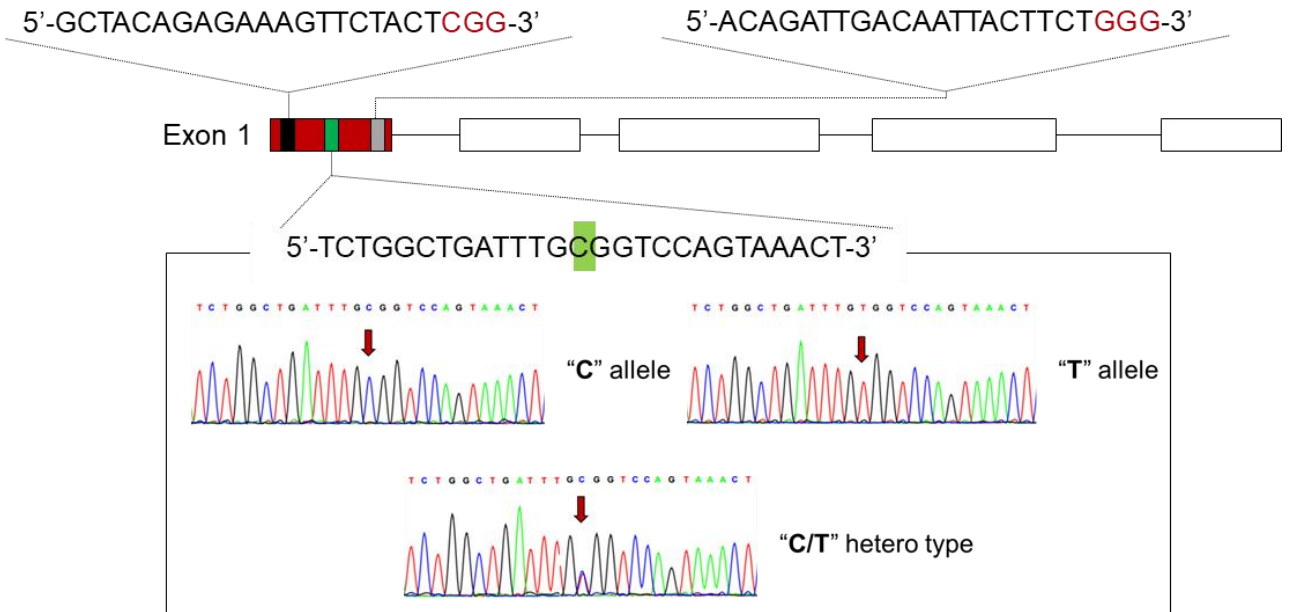

**Figure S1. Genotyping of *StSR4* target site for gRNA design.** The "C/T" hetero type in exon 1 of *StSR4* gene was confirmed by PCR-Sanger sequencing

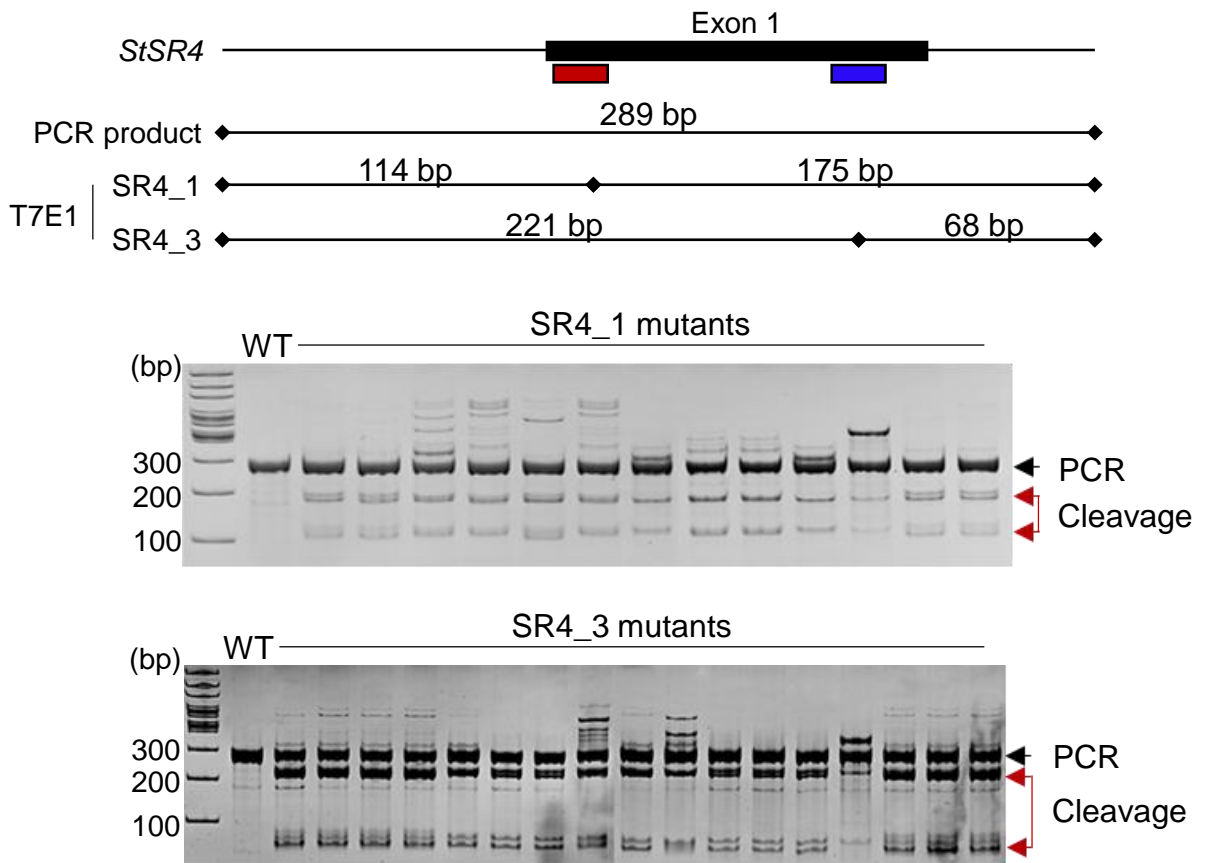

**Figure S2. T7E1 assay of mutations in *stsr4\_1* and *stsr4\_3*.** The T7E1 assay was performed to detect mutations in the *StSR4* gene from protoplast-derived regenerated plants using SR4\_1 RNPs and SR4\_3 RNPs. Black arrow indicates the wild-type fragment; red arrow indicates indel-induced fragments.

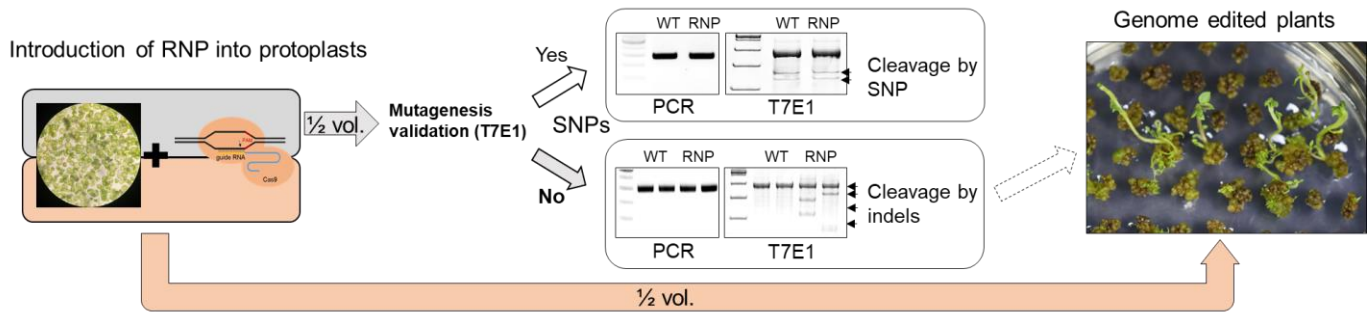

**Figure S3. Schematic diagram of a method for efficiently obtaining RNP-mediated gene edited plants.** A stable gene edited mutants were efficiently obtained by establishing a system for simultaneously performing indel analysis and culturing of RNP-transfected protoplasts

|                    |                                                |    |
|--------------------|------------------------------------------------|----|
| <i>stsr4_3-55</i>  | GCGAACCAACAGAAACAGATTGACAATTACTTCTGGGGAAG      | WT |
|                    | GCGAACCAACAGAAACAGATTGACAATTACTTCTGGGGAAG      | WT |
|                    | GCGAACCAACAGAAACAGATTGACAATTAC - TCTGGGGAAG    | -1 |
|                    | GCGAACCAACAGAAACAGATTGACAAT - - - - TCTGGGGAAG | -4 |
| <i>stsr4_3-19</i>  | GCGAACCAACAGAAACAGATTGACAATTACTTCTGGGGAAG      | WT |
|                    | GCGAACCAACAGAAACAGATTGACAATTAC - TCTGGGGAAG    | -1 |
|                    | GCGAACCAACAGAAACAGATTGACAAT - - - - TCTGGGGAAG | -4 |
|                    | GCGAACCAACAGAAACAGATTGAC - - - - - TCTGGGGAAG  | -7 |
| <i>stsr4_3-698</i> | GCGAACCAACAGAAACAGATTGACAATTACTTCTGGGGAAG      | WT |
|                    | GCGAACCAACAGAAACAGATTGACAATTAC - TCTGGGGAAG    | -1 |
|                    | GCGAACCAACAGAAACAGATTGACAATTAC - TCTGGGGAAG    | -1 |
|                    | GCGAACCAACAGAAACAGATTGACAAT - - - - TCTGGGGAAG | -4 |

**Figure S4. Sequencing of *stsr4\_3-55* (2 KO), *stsr4\_3-19* (3 KO), and *stsr4\_3-698* (3 KO) mutants by targeted deep sequencing.** The blue sequence indicates the gRNA target site. The PAM regions are shown in red. The minus (-) symbols indicate the number of nucleotides deleted in the target site.

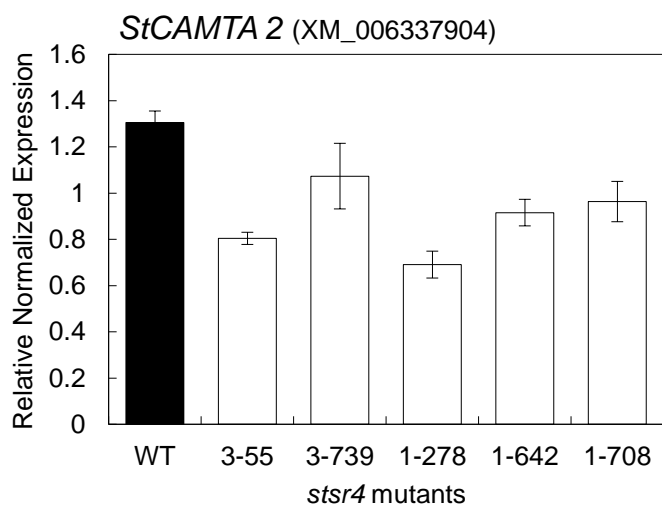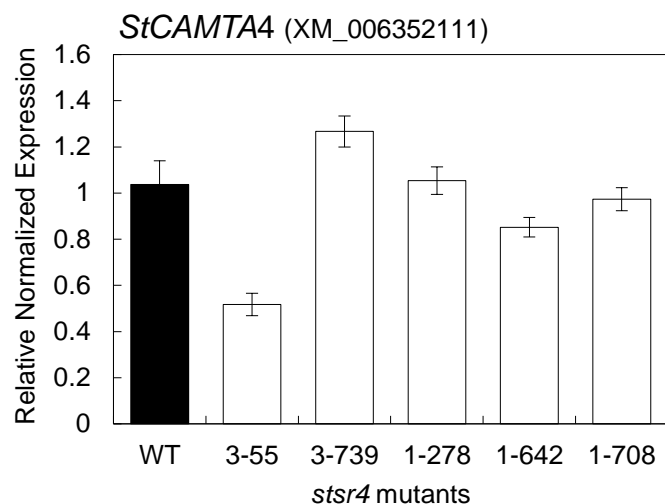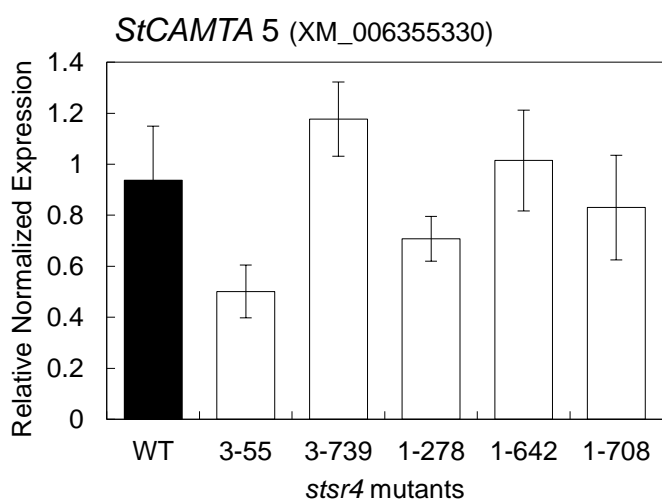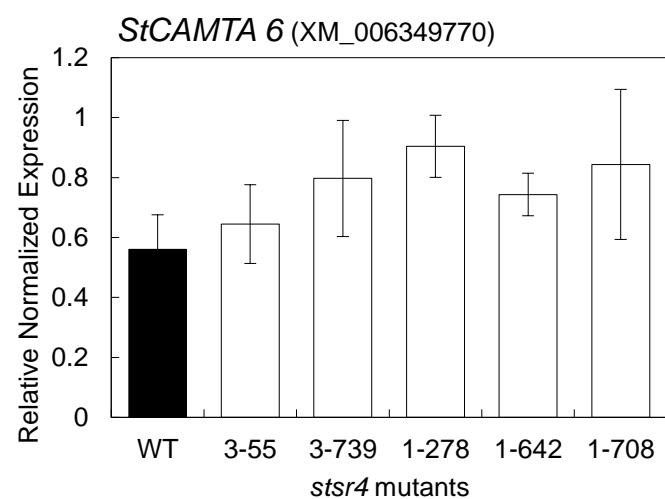

**Figure S5. Expression of *StSR4* homologous genes in the 4 KO *stsr4* mutants.** Transcript levels of *StSR4* homologous genes (accession numbers: XM\_006337904, XM\_006352111, XM\_006355330, and XM\_006349770) in *stsr4* full knockout mutants. A disease-resistant mutant line, *stsr4\_3-55*, was used as a control group. Data represent the mean  $\pm$  SE of three biological replicates.

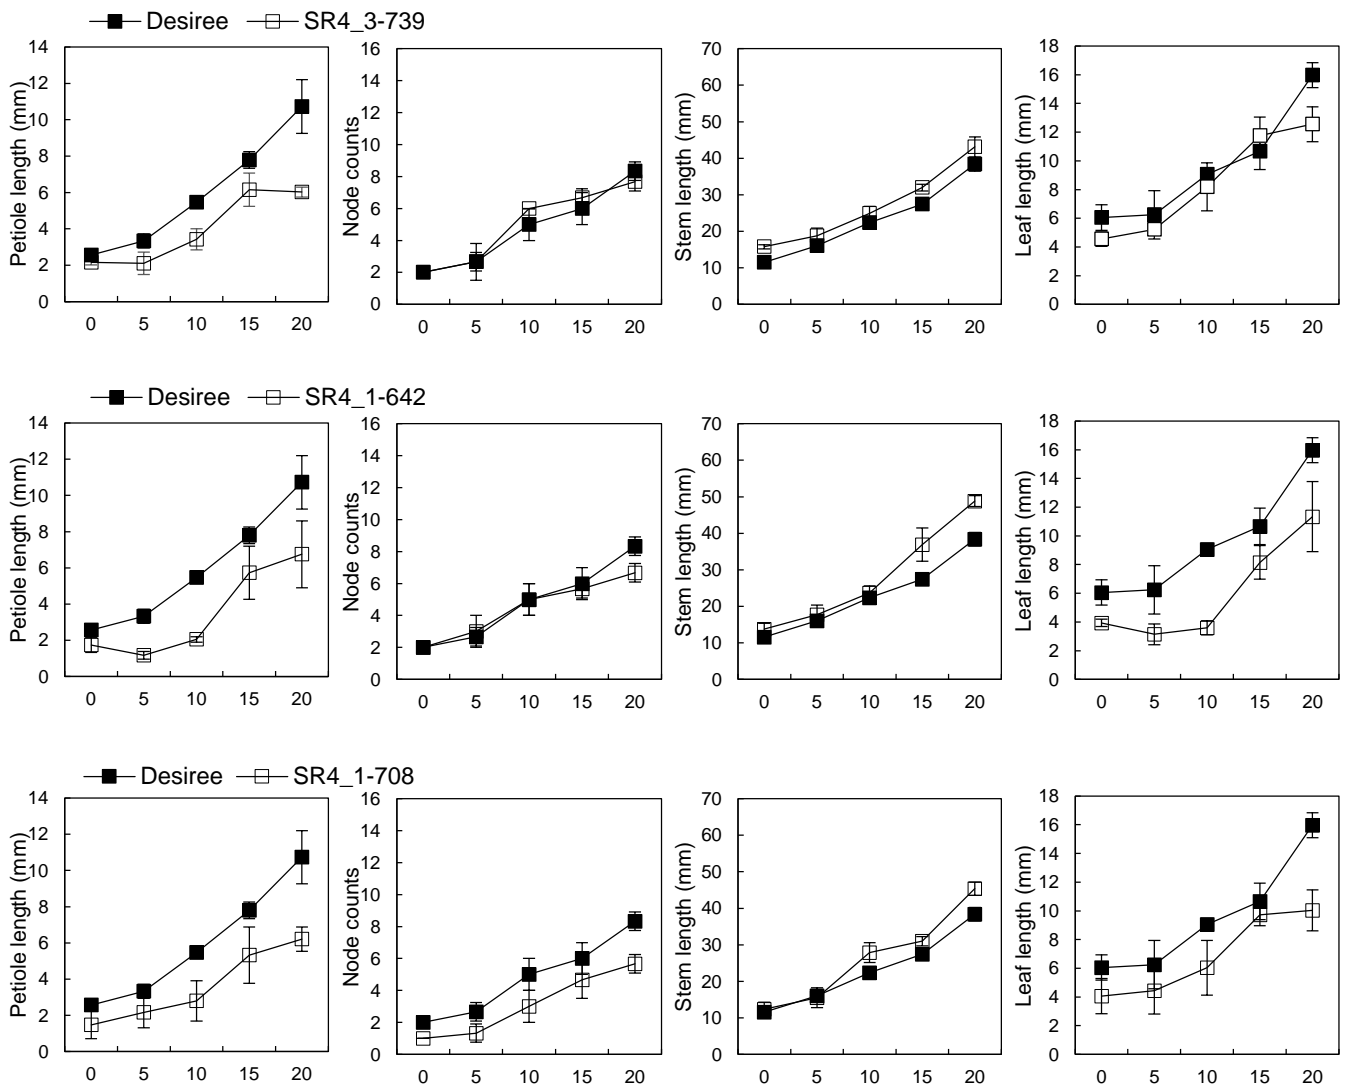

**Figure S6. Phenotypic characterization of 3 mutants (*stsr4\_3-739*, *stsr4\_1-642*, *stsr4\_1-708*).** Representative whole-plant phenotypes in wild type (cv. Desiree) and *stsr4* mutants. The typical phenotype (with petiole length, node counts, stem length, and leaf length) of each genotype was observed and photographed every five days. Values represent the mean  $\pm$  SE of six replicated experiments (each mean value represents the measured phenotype of four plants).
